# Supplementary material
Source: Springer Nature journal article supplement (https://www.springermedizin.de/resource/supplementary/12913_2007_477_MOESM1_ESM.pdf/9534832)
Supplement: MOESM1 [file 9534832]

24% of patients receive no structured diabetes care in either specialty care or general practices

60% of people may receive most of their diabetes care from their general practitioner though for many this care is unstructured without the routine use of practice diabetes registers and recall systems.

There is limited access to community based dietician services and chiropody services vary according to an individuals' income

One third of the total population are medical card holders which entitles them to free GP, hospital and community care. The allocation of medical cards is means tested. The remaining two thirds pay for services in the general practice but are entitled to free hospital treatment.
